# Supplementary material for: Targeting PCSK9, through an innovative cVLP-based vaccine, enhanced the therapeutic activity of a cVLP-HER2 vaccine in a preclinical model of HER2-positive mammary carcinoma
Source: Springer Nature journal article supplement (doi:10.1186/s12967-025-06126-w), 2025-01-30
Supplement: MOESM1 [file 12967_2025_6126_MOESM1_ESM.docx]

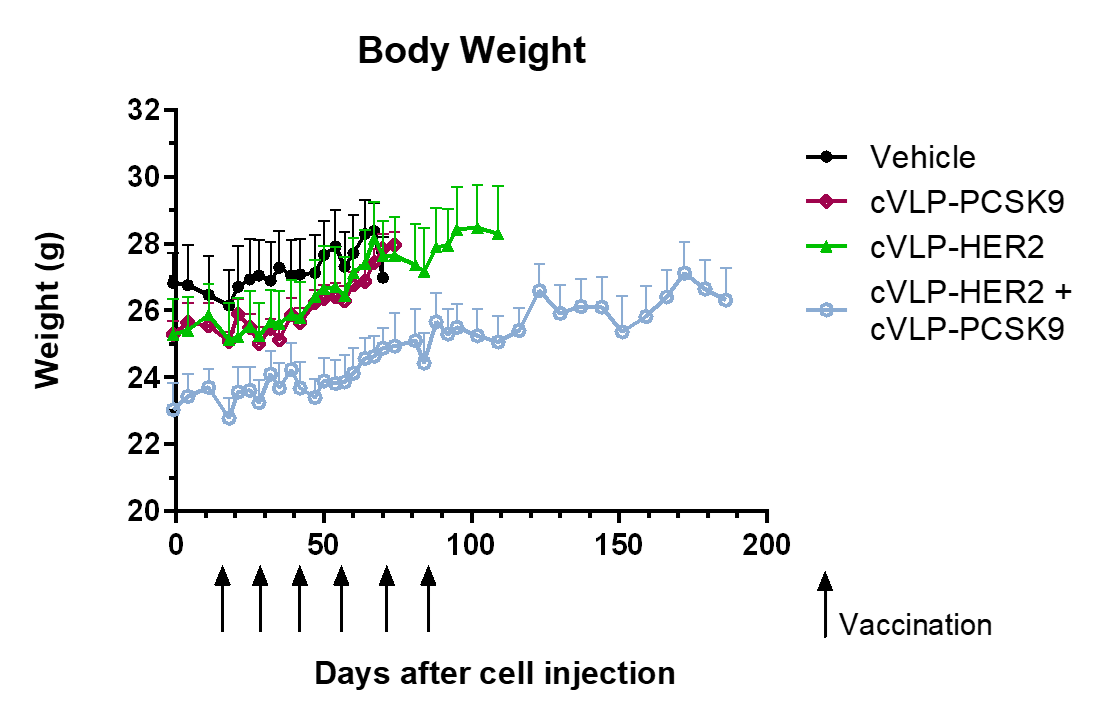


**Supplementary Figure S1.** Weight curves of FVB mice challenged m.f.p. with MamBo89HER2stable cells and vaccinated with cVLP-PCSK9, cVLP-HER2 and cVLP-HER2+cVLP-PCSK9 vaccines.Each point represents the mean (and SEM) of all mice in each group, n=6. *See* Figure 1 for tumor growth in these mice and Figures 2 and 3 for antibody kinetics.


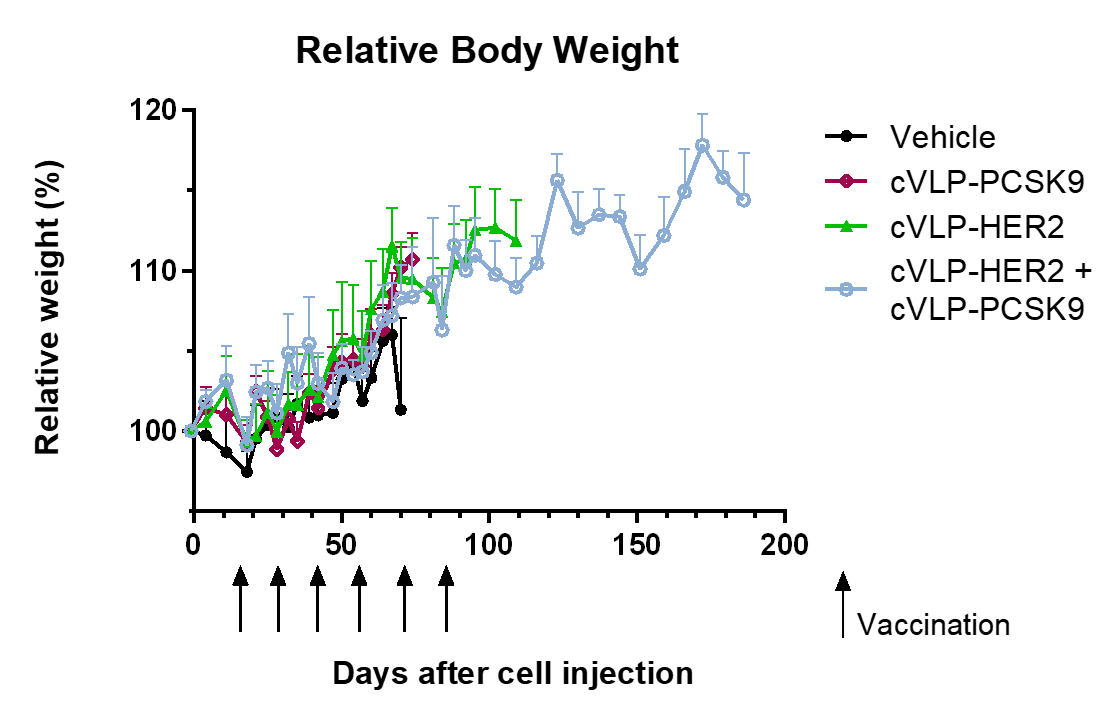


**Supplementary Figure S2.** Relative weight curves of FVB mice challenged m.f.p. with MamBo89HER2stable cells and vaccinated with cVLP-PCSK9, cVLP-HER2 and cVLP-HER2+cVLP-PCSK9 vaccines.Each point represents the mean (and SEM) of all mice in each group, n=6. *See* Figure 1 for tumor growth in these mice and Figures 2 and 3 for antibody kinetics.
